# Supplementary material for: Qualitative and quantitative analysis of metronidazole formulations using a low-cost near infrared transmission spectrophotometer and chemometric tools
Source: Royal Society of Chemistry journal article supplement (doi:10.1039/d4ay02251c), 2025-01-01
Supplement: d4ay02251c1.pdf [file d4ay02251c1.pdf]

## Supplementary Information

### Qualitative and quantitative analysis of metronidazole formulations using a low-cost near infrared transmission spectrophotometer and chemometric tools

Moussa YABRE<sup>a,b</sup>, Abdoul Karim SAKIRA<sup>b</sup>, Moumouni BANDE<sup>b</sup>, Kouka Luc DELMA<sup>c</sup>,  
Isaïe Nyamba<sup>a,c</sup>, Loconon Y. Achille YEMOA<sup>d</sup>, Souleymane FOFANA<sup>a</sup>, Touridomon Issa  
SOME<sup>b</sup>

<sup>a</sup> Institut Supérieur des Sciences de la Santé (INSSA), Université Nazi Boni, 01 BP 1091 Bobo-Dioulasso 01, Burkina Faso

<sup>b</sup> Laboratoire de Toxicologie, Environnement et Santé (LATES), Ecole Doctorale des Sciences de la Santé (ED2S), Université Joseph KI-ZERBO, 03 BP 7021 03 Ouagadougou, Burkina Faso

<sup>c</sup> Laboratoire de Développement du Médicament(LADME), Ecole Doctorale des Sciences de la Santé (ED2S), Université Joseph KI-ZERBO, 03 BP 7021 03 Ouagadougou, Burkina Faso

<sup>d</sup> Laboratory of Analytical Chemistry and Drug Analysis (LCAM), Faculty of Health Sciences, University of Abomey-Calavi, Cotonou, Benin

\*Corresponding author: [yabr.moussa@yahoo.fr](mailto:yabr.moussa@yahoo.fr)

**Table S1** Raw validation data of the quantitative method

| <b>Series</b> | <b>Concentration level<br/>(mg mL<sup>-1</sup>)</b> | <b>Introduced concentration<br/>(mg mL<sup>-1</sup>)</b> | <b>Predicted concentration<br/>(mg mL<sup>-1</sup>)</b> |
|---------------|-----------------------------------------------------|----------------------------------------------------------|---------------------------------------------------------|
| Series 1      | 50                                                  | 48.9                                                     | 47.2                                                    |
|               | 50                                                  | 52.0                                                     | 50.6                                                    |
|               | 50                                                  | 50.4                                                     | 48.0                                                    |
|               | 75                                                  | 75.5                                                     | 74.2                                                    |
|               | 75                                                  | 76.3                                                     | 75.3                                                    |
|               | 75                                                  | 75.9                                                     | 75.6                                                    |
|               | 90                                                  | 90.5                                                     | 90.9                                                    |
|               | 90                                                  | 90.1                                                     | 90.8                                                    |
|               | 90                                                  | 90.3                                                     | 90.3                                                    |
|               | 100                                                 | 102.7                                                    | 103.1                                                   |
|               | 100                                                 | 101.4                                                    | 102.0                                                   |
|               | 100                                                 | 102.1                                                    | 101.9                                                   |
|               | 125                                                 | 124.6                                                    | 124.0                                                   |
|               | 125                                                 | 124.7                                                    | 124.0                                                   |
|               | 125                                                 | 124.6                                                    | 121.2                                                   |
| Series 2      | 50                                                  | 50.4                                                     | 49.5                                                    |
|               | 50                                                  | 49.3                                                     | 48.9                                                    |
|               | 50                                                  | 49.8                                                     | 48.3                                                    |
|               | 75                                                  | 76.1                                                     | 77.0                                                    |
|               | 75                                                  | 75.8                                                     | 76.1                                                    |
|               | 75                                                  | 76.0                                                     | 75.7                                                    |
|               | 90                                                  | 91.3                                                     | 92.5                                                    |
|               | 90                                                  | 91.2                                                     | 92.4                                                    |
|               | 90                                                  | 91.2                                                     | 92.0                                                    |
|               | 100                                                 | 100.6                                                    | 101.5                                                   |
|               | 100                                                 | 101.3                                                    | 102.0                                                   |
|               | 100                                                 | 100.9                                                    | 101.6                                                   |
|               | 125                                                 | 124.9                                                    | 124.8                                                   |
|               | 125                                                 | 123.8                                                    | 123.2                                                   |
|               | 125                                                 | 124.3                                                    | 123.1                                                   |
| Series 3      | 50                                                  | 51.6                                                     | 51.8                                                    |
|               | 50                                                  | 51.6                                                     | 52.6                                                    |
|               | 50                                                  | 52.4                                                     | 51.8                                                    |
|               | 75                                                  | 76.2                                                     | 76.2                                                    |
|               | 75                                                  | 76.2                                                     | 76.8                                                    |
|               | 75                                                  | 74.4                                                     | 75.2                                                    |
|               | 90                                                  | 88.8                                                     | 87.3                                                    |
|               | 90                                                  | 88.8                                                     | 88.1                                                    |
|               | 90                                                  | 89.9                                                     | 89.2                                                    |
|               | 100                                                 | 100.3                                                    | 101.2                                                   |
|               | 100                                                 | 100.3                                                    | 101.9                                                   |
|               | 100                                                 | 103.8                                                    | 104.2                                                   |

|     |       |       |
|-----|-------|-------|
| 125 | 125.4 | 124.8 |
| 125 | 125.4 | 124.2 |
| 125 | 127.4 | 125.8 |

**Table S2** Results of the quantitative analysis of metronidazole tablets using the validated PLS model

| <b>Brand name</b>       | <b>Dosage (mg)</b> | <b>Number of tested batches</b> | <b>Metronidazole content (%) range</b> |
|-------------------------|--------------------|---------------------------------|----------------------------------------|
| Flagyl <sup>®</sup>     | 500                | 03                              | 95,4 – 100,6                           |
| Flagyl <sup>®</sup>     | 250                | 02                              | 98,2 – 99,0                            |
| Nidazol <sup>®</sup>    | 500                | 02                              | 98,6 – 99,8                            |
| Metronidazole Africure  | 500                | 03                              | 96,3 – 99,0                            |
| Metronidazole Africure  | 250                | 02                              | 92,4 – 95,1                            |
| Metronidazole Humanwell | 500                | 06                              | 97,2 – 99,4                            |
| Metronidazole Tongmei   | 500                | 02                              | 101,0 – 102,0                          |

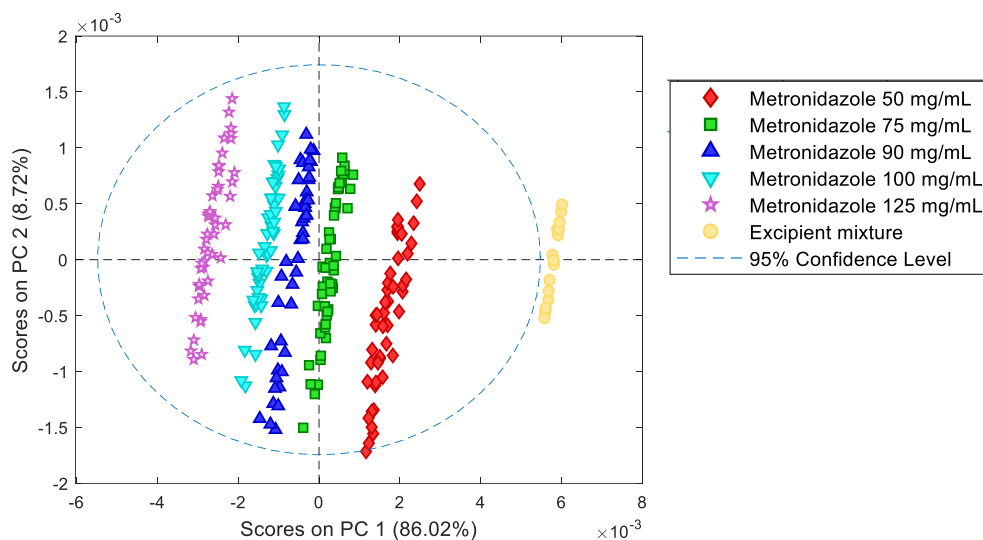

**Fig. S1** PC1-PC2 score plot of the preprocessed spectra of metronidazole calibration samples and excipient mixture

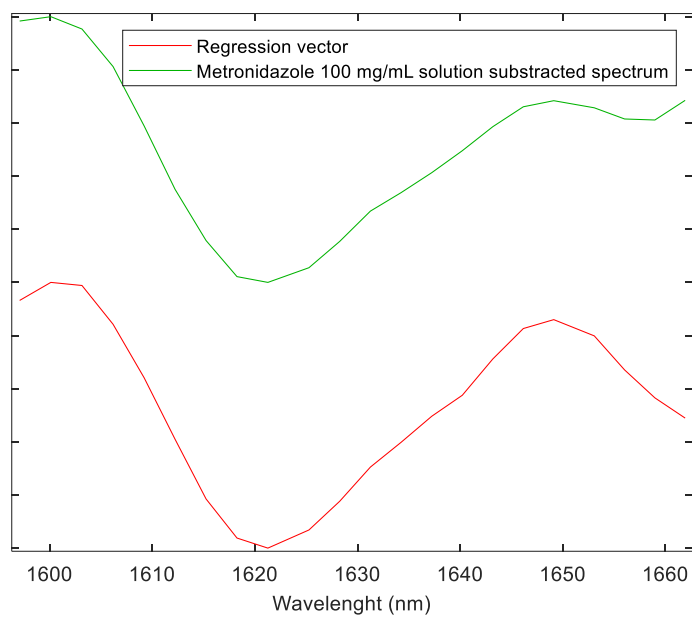

**Fig. S2** Regression vector presented with the spectrum of  $100 \text{ mg mL}^{-1}$  metronidazole solution. The spectral range and preprocessing are those utilized in the PLS model. To visualize the metronidazole bands, the preprocessed spectrum of 1M HCl was subtracted from the metronidazole solution spectrum. The spectra are offset to improve visual discernibility.

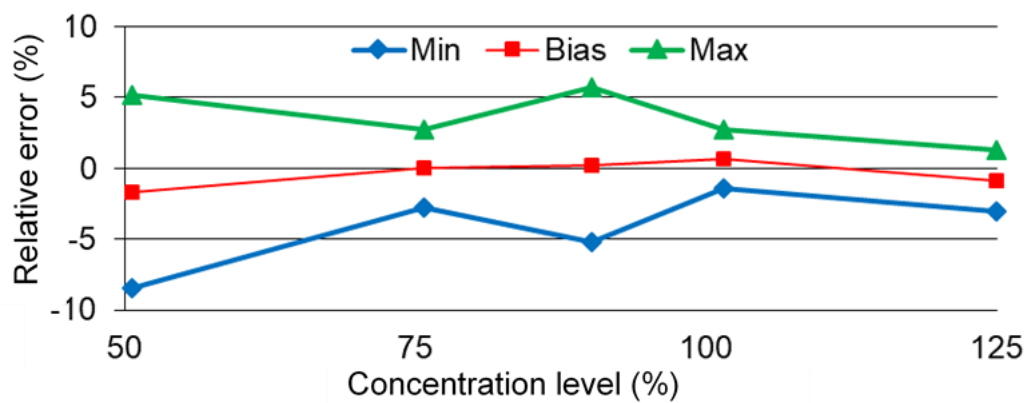

**Fig. S3.** Accuracy profile of the quantitative method
